# Supplementary material
Source: MDPI journal article supplement (https://www.mdpi.com/2227-9717/8/9/1193)
Supplement: s1 [file s1]

# Supplementary material

Article

## Analysis and Anticancer Effects of Active Compounds from *Spatholobi Caulis* in Human Breast Cancer Cells

Hung Manh Phung <sup>1,†</sup>, Hesol Lee <sup>2,†</sup>, Sullim Lee <sup>3,†</sup>, Dongyeop Jang <sup>4</sup>, Chang-Eop Kim <sup>4</sup>,  
Ki Sung Kang <sup>1</sup>, Chang-Seob Seo <sup>5,\*</sup> and You-Kyung Choi <sup>2,\*</sup>

<sup>1</sup> Department of Preventive medicine, College of Korean Medicine, Gachon University, Seongnam 13120, Korea; manhspkt92@gmail.com (H.M.P.); kkang@gachon.ac.kr (K.S.K.)

<sup>2</sup> Department of Korean International Medicine, College of Korean Medicine, Gachon University, Seongnam 13120, Korea; haesol89@naver.com

<sup>3</sup> Department of Life Science, College of Bio-Nano Technology, Gachon University, Seongnam 13120, Korea; sullimlee@gachon.ac.kr

<sup>4</sup> Department of Physiology, College of Korean Medicine, Gachon University, Seongnam 13120, Korea; jngdngyp@naver.com (D.J.); eopchang@gachon.ac.kr (C.-E.K.)

<sup>5</sup> Herbal Medicine Research Division, Korea Institute of Oriental Medicine, Daejeon 34054, Korea

\* Correspondence: csseo0914@kiom.re.kr (C.-S.S.); kosmos@gachon.ac.kr (Y.-K.C.);  
Tel.: +82-42-868-9361 (C.-S.S.); +82-32-770-1300 (Y.-K.C.)

† These authors contributed equally to this work.

Received: 21 July 2020; Accepted: 18 September 2020; Published: date

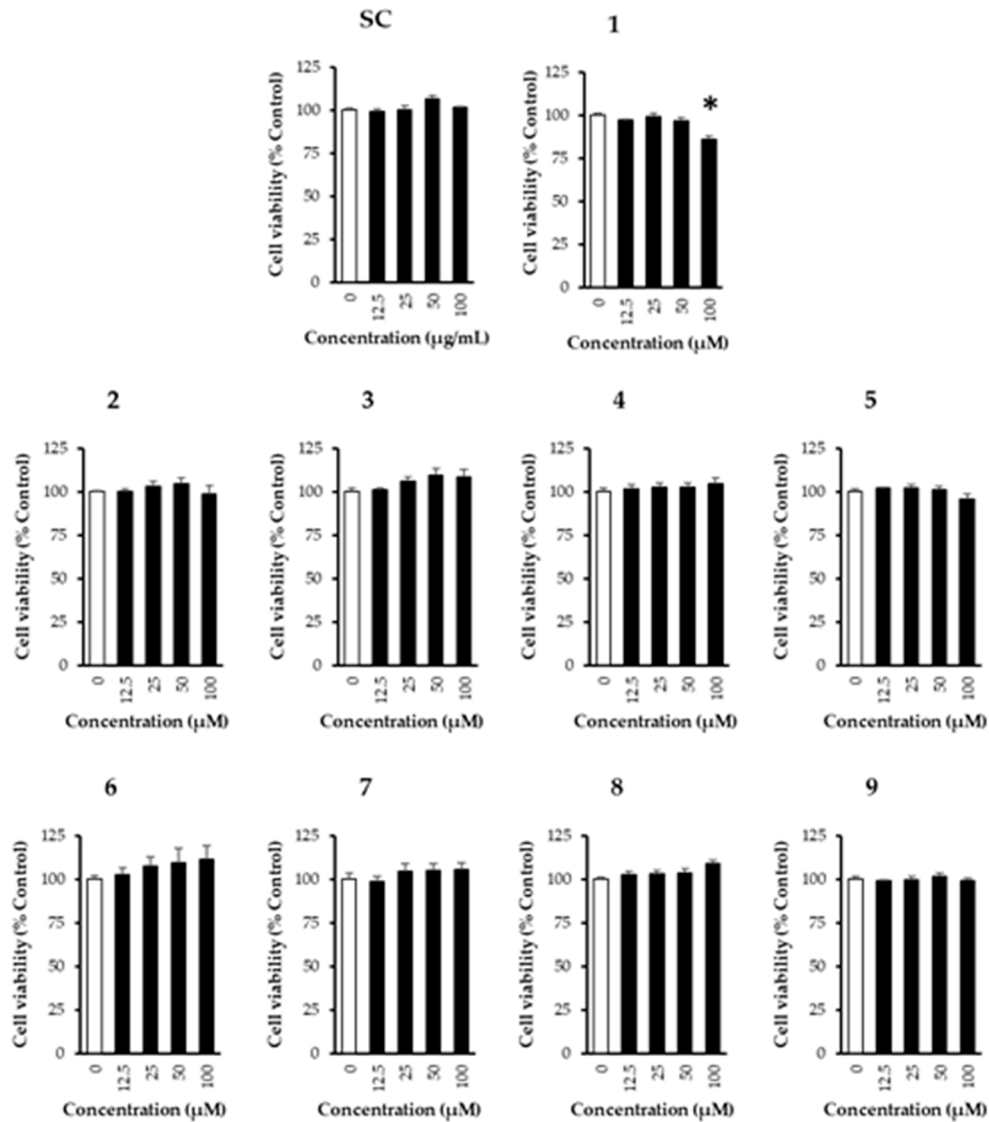

**Figure S1.** The cytotoxic effects of the 70% ethanol extract of *Spatholobi Caulis* (SC), gallic acid (1), (-)-gallocatechin (2), 3,4-dihydroxybenzoic acid (3), procyanidin B1 (4), 3,4-dihydroxybenzaldehyde (5), catechin (6), procyanidin B2 (7), epicatechin (8), and (-)-epicatechin gallate (9) in human dermal fibroblast (HDF) cells. The cells were treated with the sample for 24 h, and cell survival was detected using the Ez-Cytox cell viability assay kit (N=3). Data are presented as the mean  $\pm$  SD. \* $p < 0.05$  compared with the non-treated group.

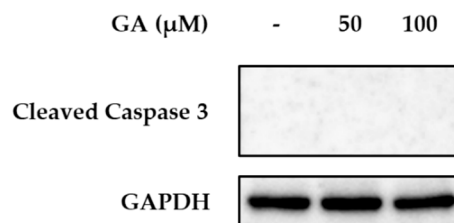

**Figure S2.** Effect of 70% ethanol extract of gallic acid (GA) on expression of cleaved caspase 3 in MCF-7 cells. The cells were treated with specific doses of SC for 24 h, and protein-regulated apoptosis expression was determined by western blotting (N=2).
